# Supplementary material for: A systematic evaluation of the performance and properties of the UK Biobank Polygenic Risk Score (PRS) Release
Source: PubMed Central journal article supplement (PMC11410272; doi:10.1371/journal.pone.0307270), 2024-09-18
Supplement: pone.0307270.s019.pdf [file pone.0307270.s019.pdf]

A

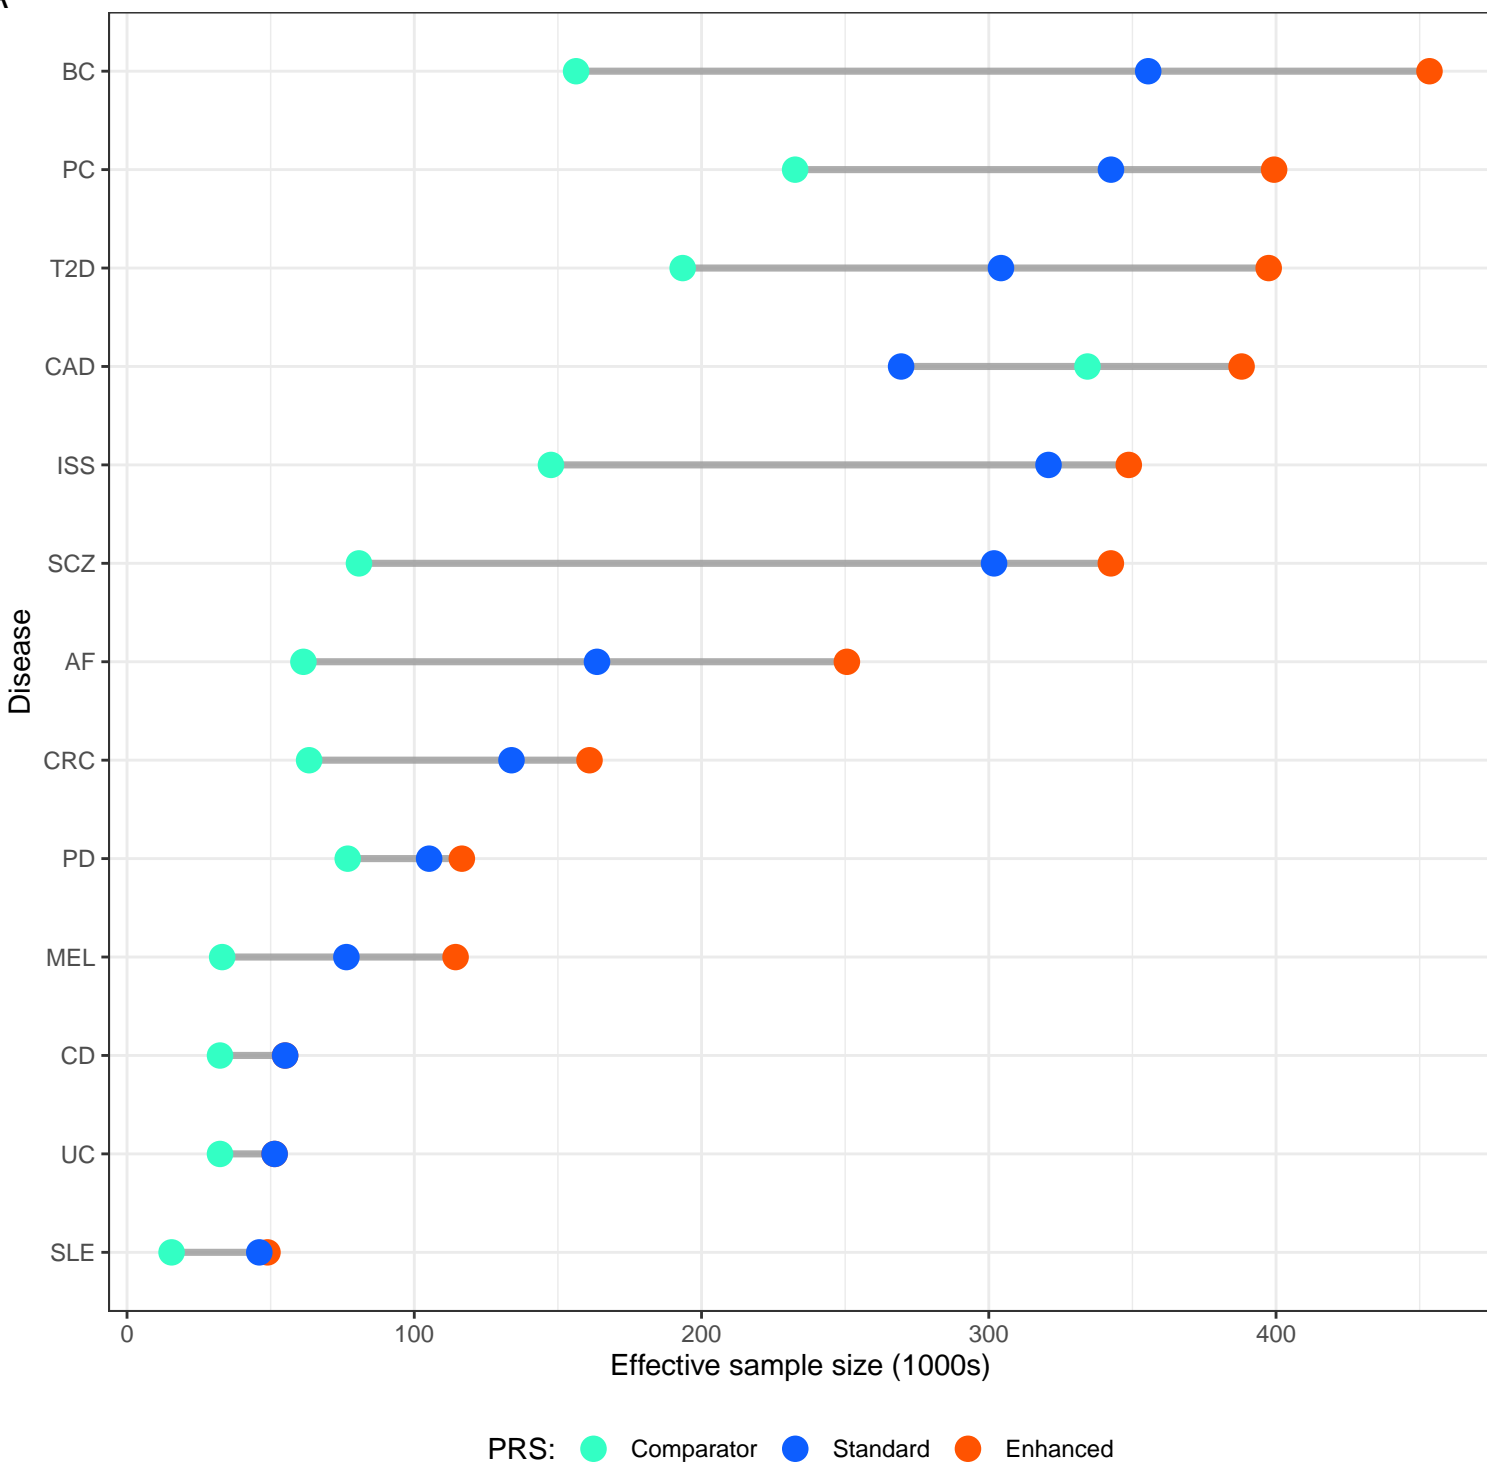

**B**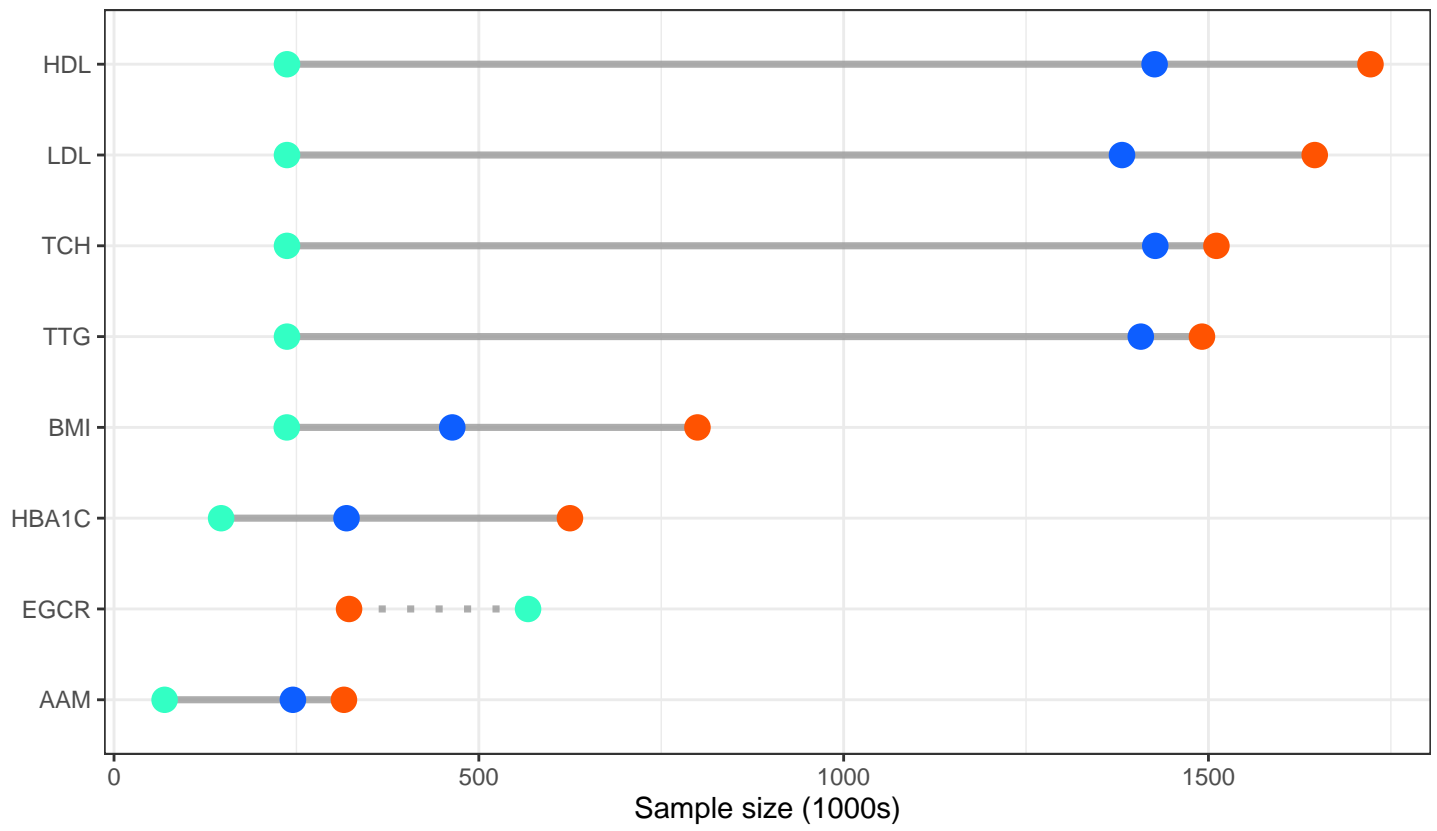

PRS: ● Comparator ● Standard ● Enhanced
