# Supplementary material for: A systematic evaluation of the performance and properties of the UK Biobank Polygenic Risk Score (PRS) Release
Source: PubMed Central journal article supplement (PMC11410272; doi:10.1371/journal.pone.0307270), 2024-09-18
Supplement: pone.0307270.s023.pdf [file pone.0307270.s023.pdf]

**A**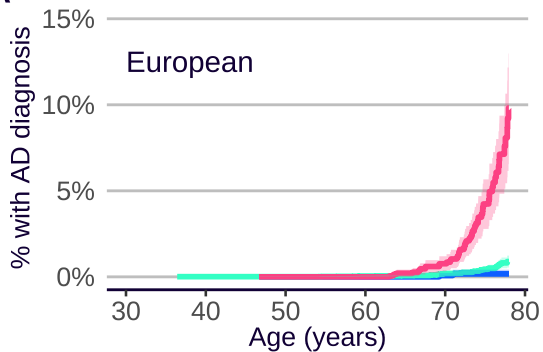

East Asian &lt;40 cases

South Asian &lt;40 cases

African &lt;40 cases

— Highest 3% PRS    — Median PRS    — Lowest 3% PRS

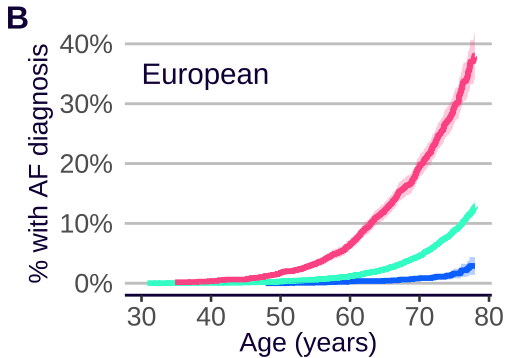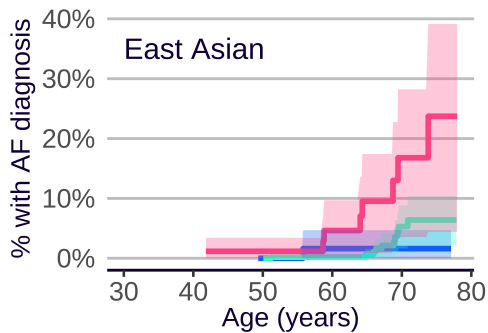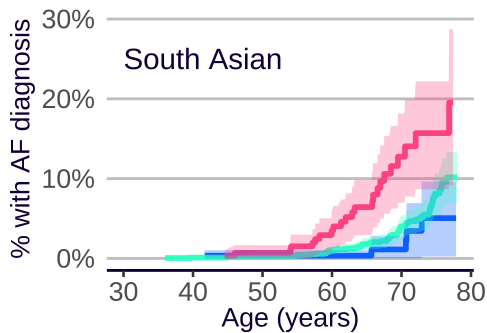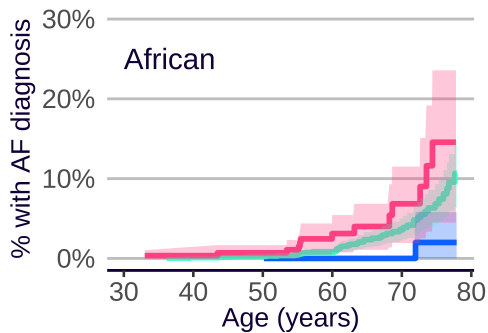

— Highest 3% PRS    — Median PRS    — Lowest 3% PRS

**C**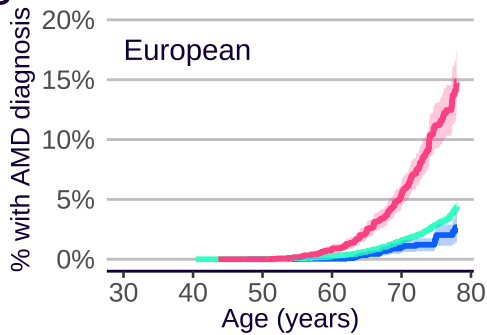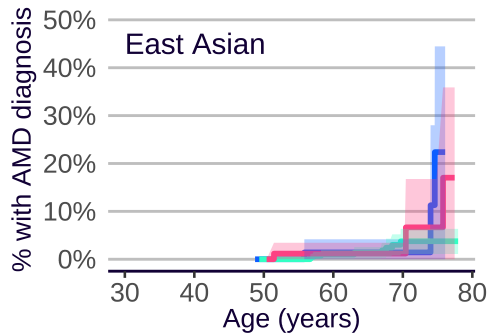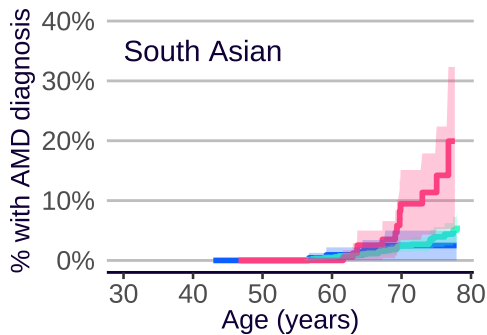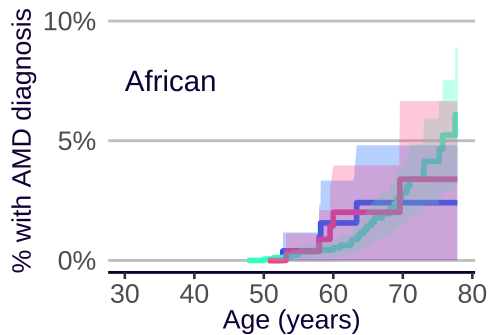

— Highest 3% PRS    — Median PRS    — Lowest 3% PRS

**D**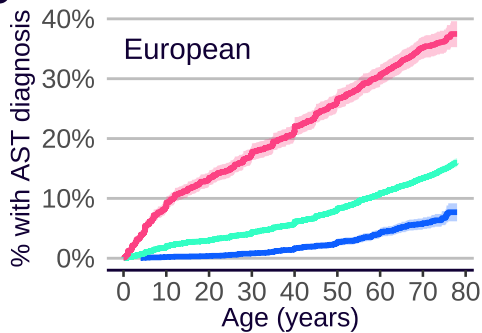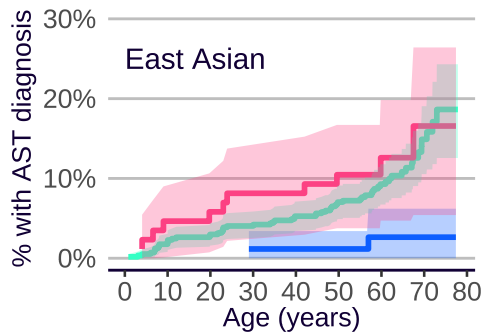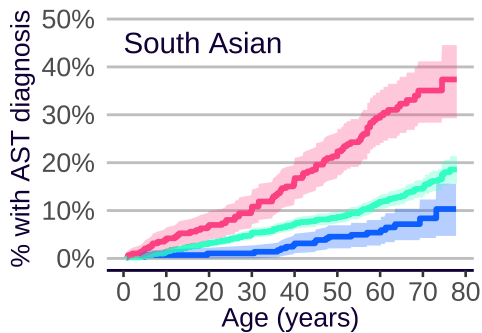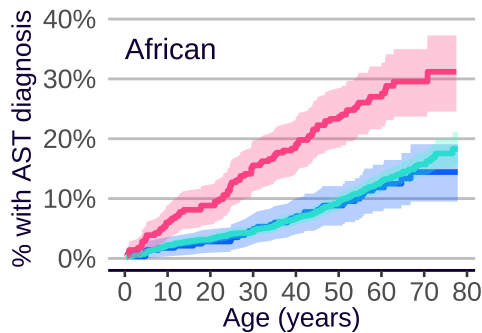

— Highest 3% PRS    — Median PRS    — Lowest 3% PRS



**E**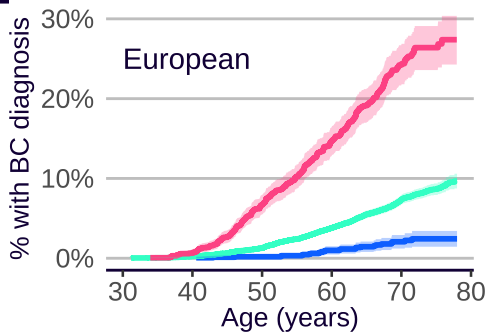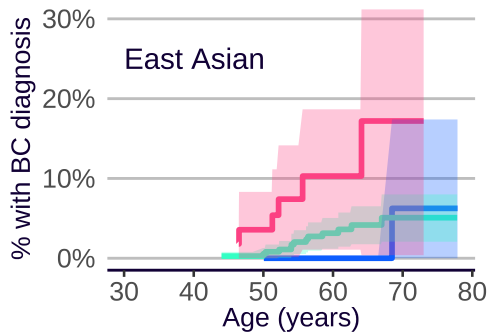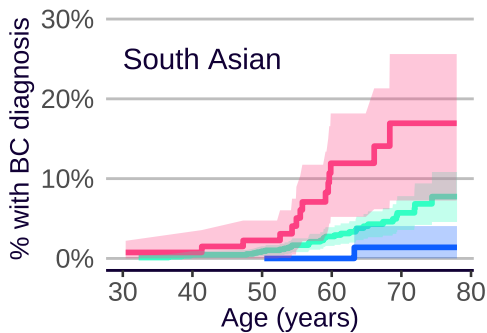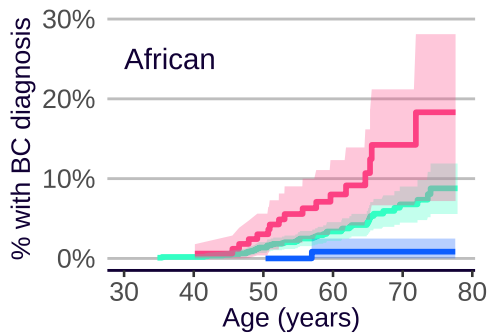

— Highest 3% PRS    — Median PRS    — Lowest 3% PRS

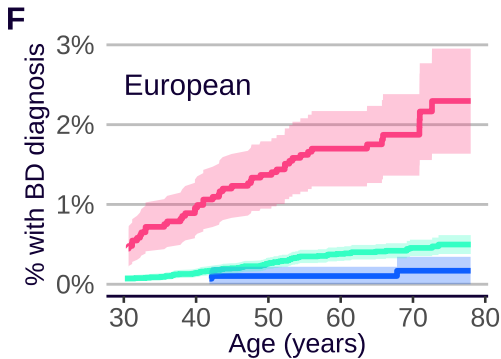

South Asian <40 cases

East Asian <40 cases

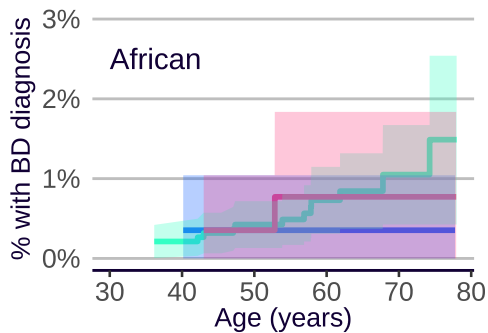

— Highest 3% PRS    — Median PRS    — Lowest 3% PRS

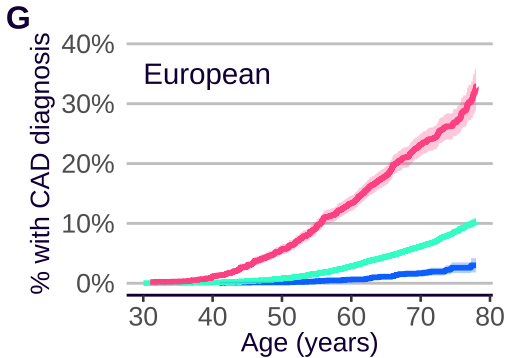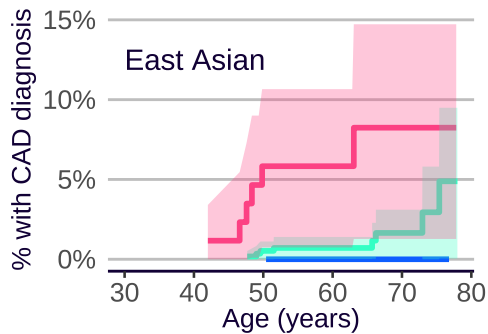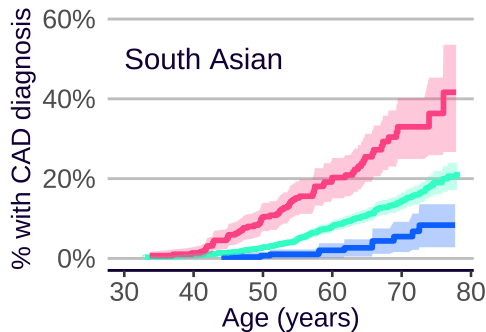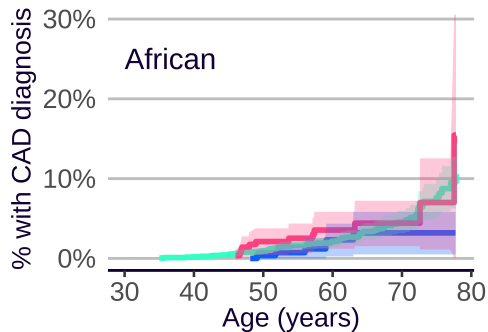

— Highest 3% PRS    — Median PRS    — Lowest 3% PRS

**H**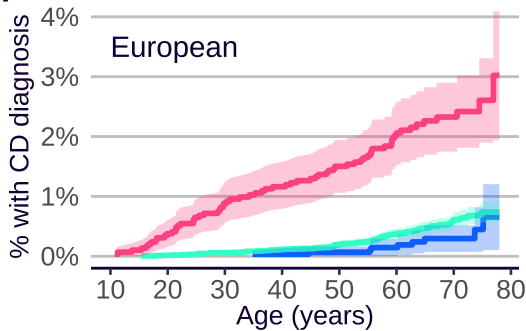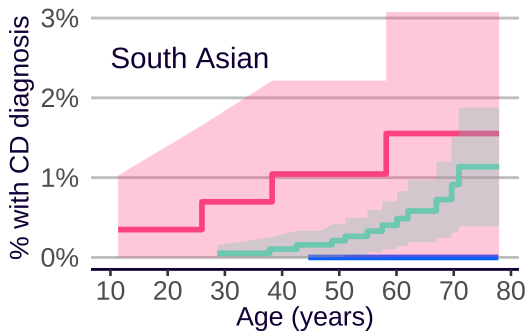

— Highest 3% PRS    — Median PRS    — Lowest 3% PRS

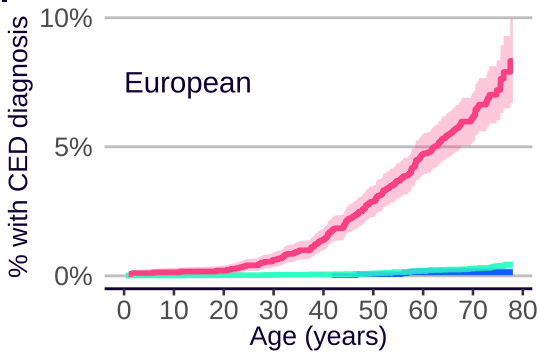

East Asian <40 cases

South Asian <40 cases

African <40 cases

— Highest 3% PRS    — Median PRS    — Lowest 3% PRS

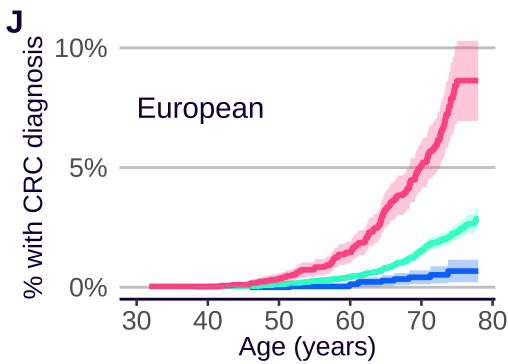

East Asian <40 cases

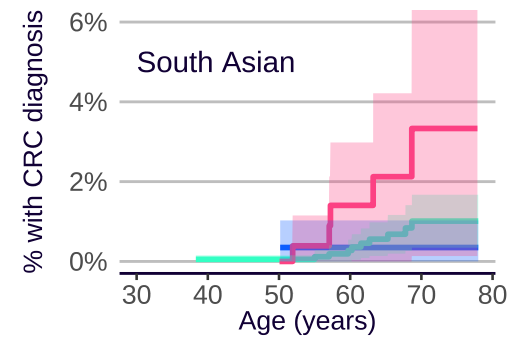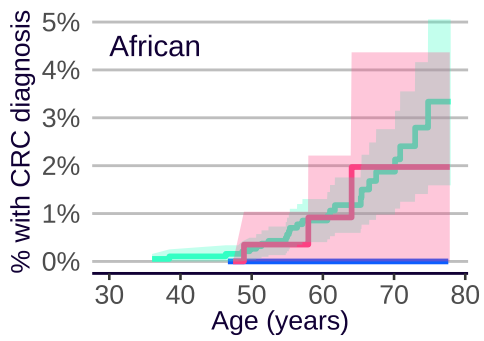

— Highest 3% PRS    — Median PRS    — Lowest 3% PRS

**K**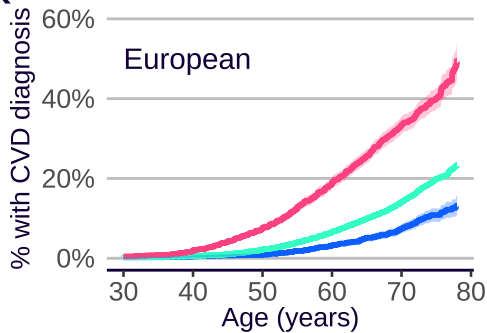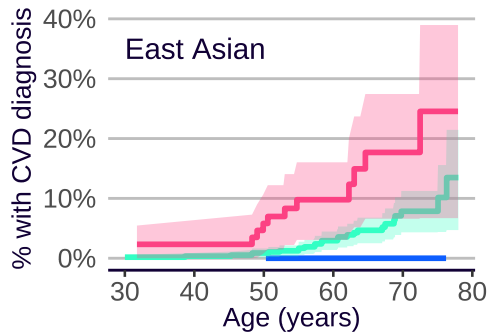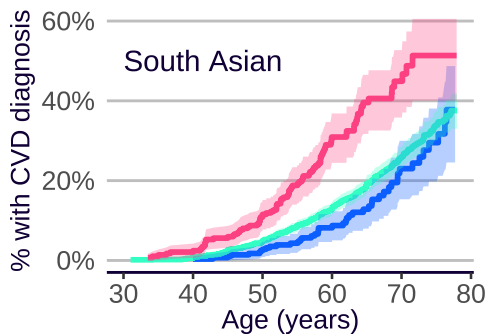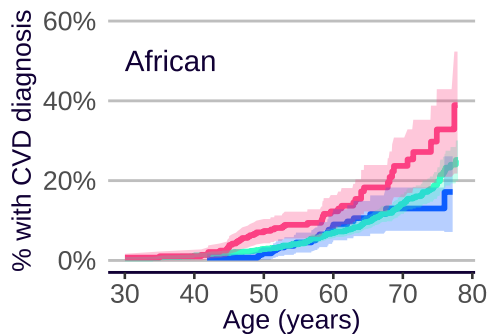

— Highest 3% PRS    — Median PRS    — Lowest 3% PRS

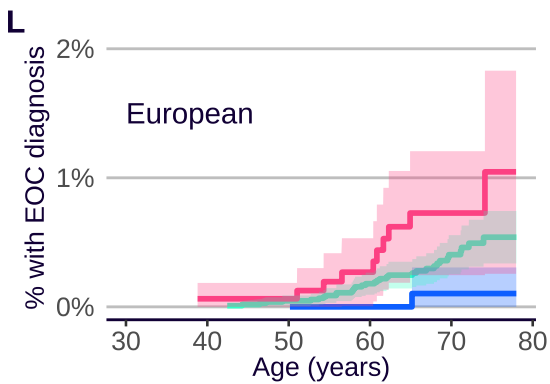

South Asian <40 cases

East Asian <40 cases

African <40 cases

— Highest 3% PRS    — Median PRS    — Lowest 3% PRS



**M**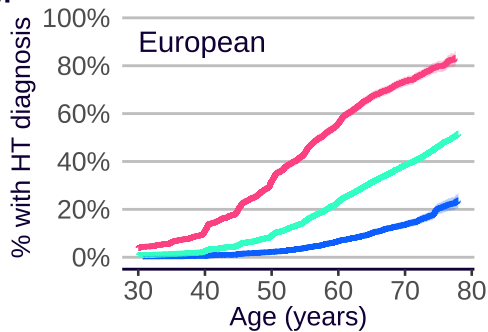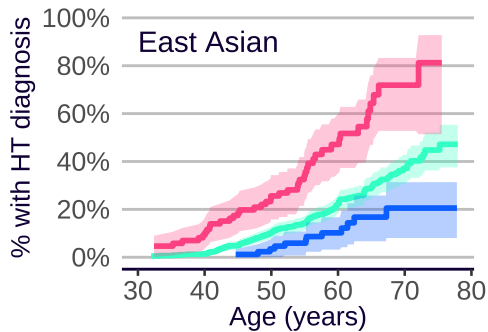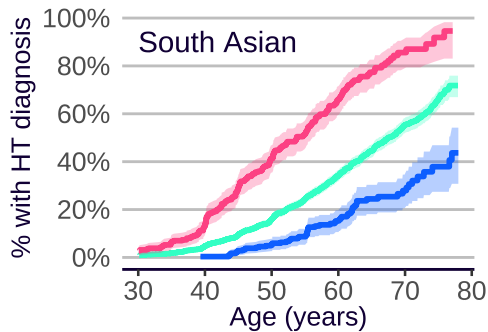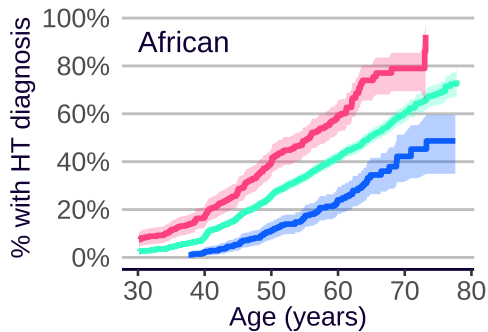

— Highest 3% PRS    — Median PRS    — Lowest 3% PRS

**N**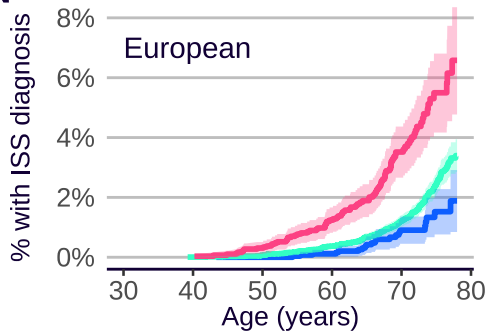

East Asian &lt;40 cases

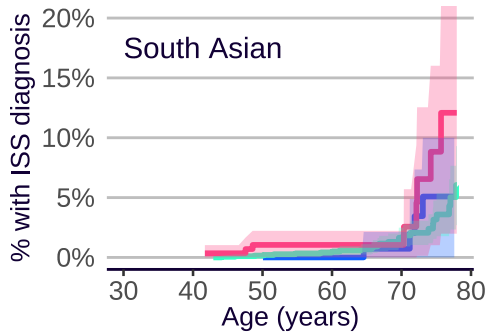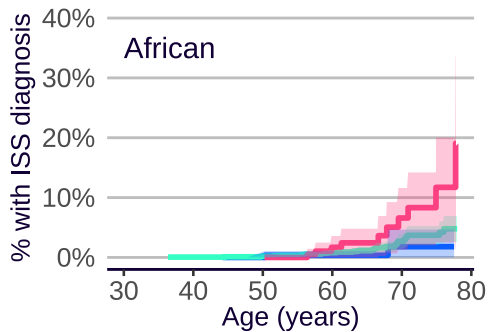

— Highest 3% PRS    — Median PRS    — Lowest 3% PRS

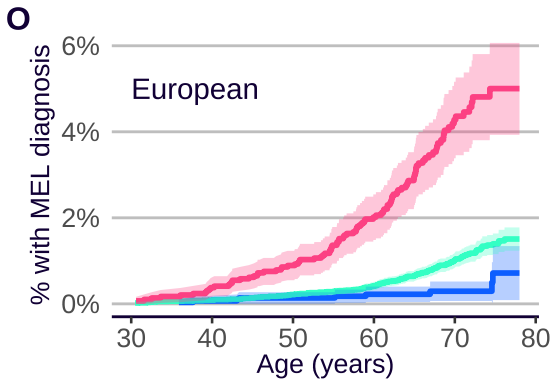

East Asian <40 cases

South Asian <40 cases

African <40 cases

— Highest 3% PRS    — Median PRS    — Lowest 3% PRS

P

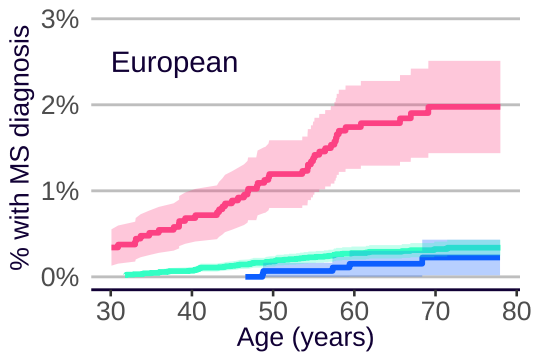

East Asian <40 cases

South Asian <40 cases

African <40 cases

— Highest 3% PRS    — Median PRS    — Lowest 3% PRS

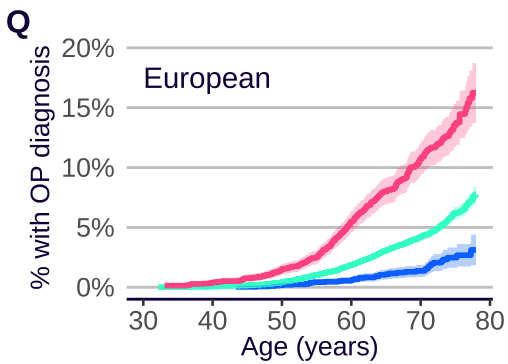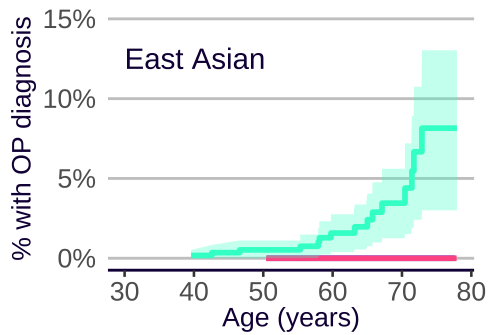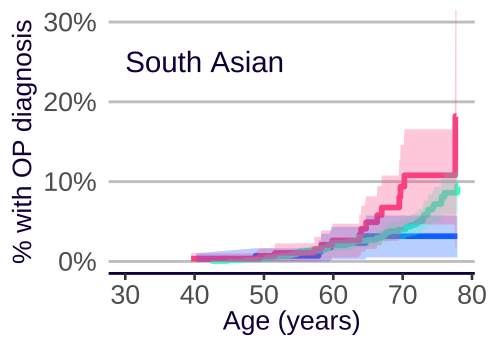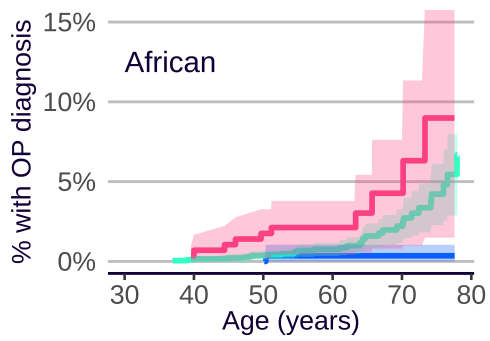

— Highest 3% PRS    — Median PRS    — Lowest 3% PRS

**R**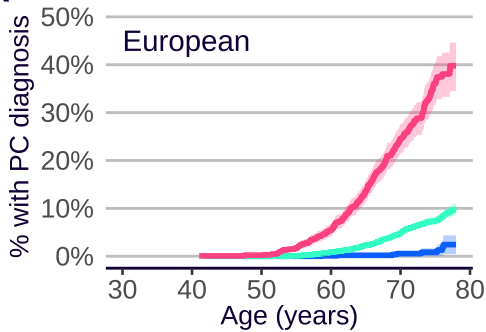

East Asian &lt;40 cases

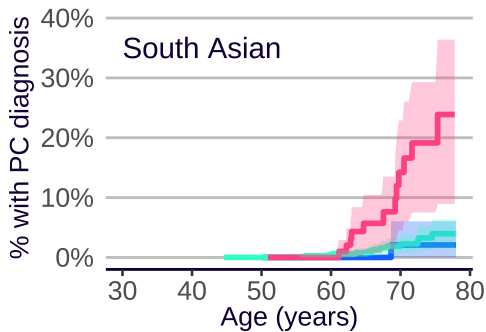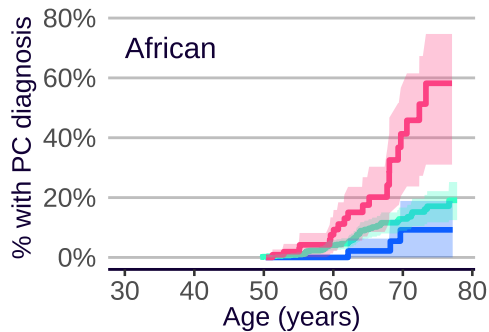

— Highest 3% PRS    — Median PRS    — Lowest 3% PRS

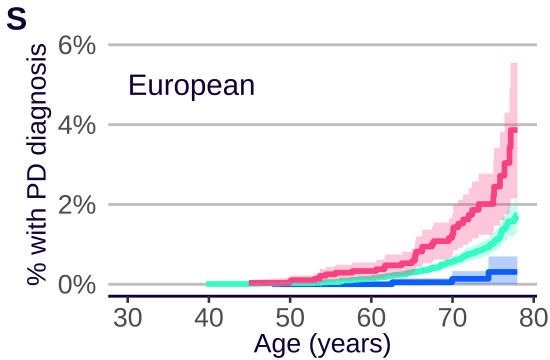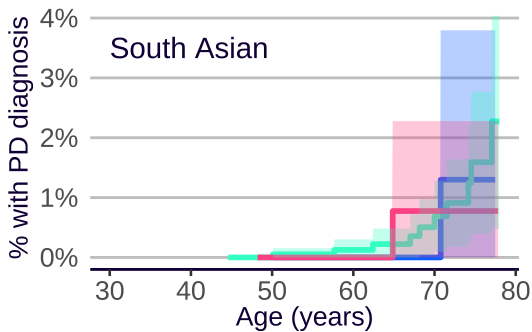

— Highest 3% PRS   
 — Median PRS   
 — Lowest 3% PRS

**T**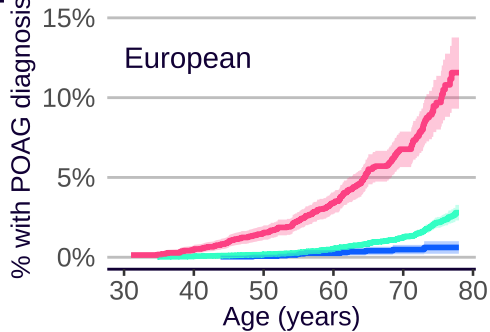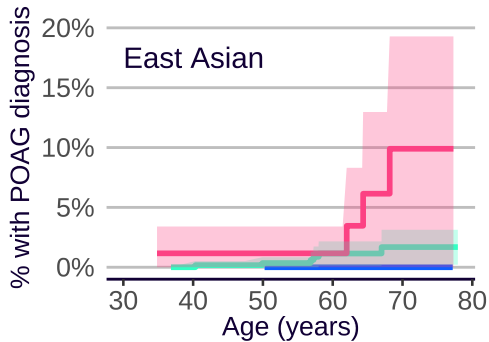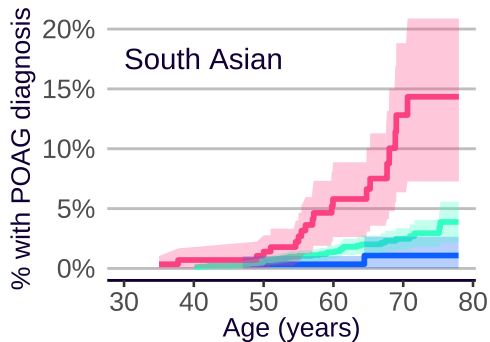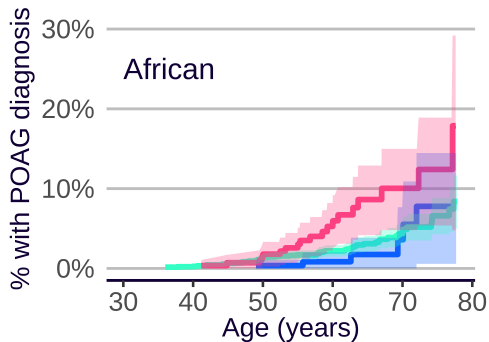

— Highest 3% PRS    — Median PRS    — Lowest 3% PRS



**U**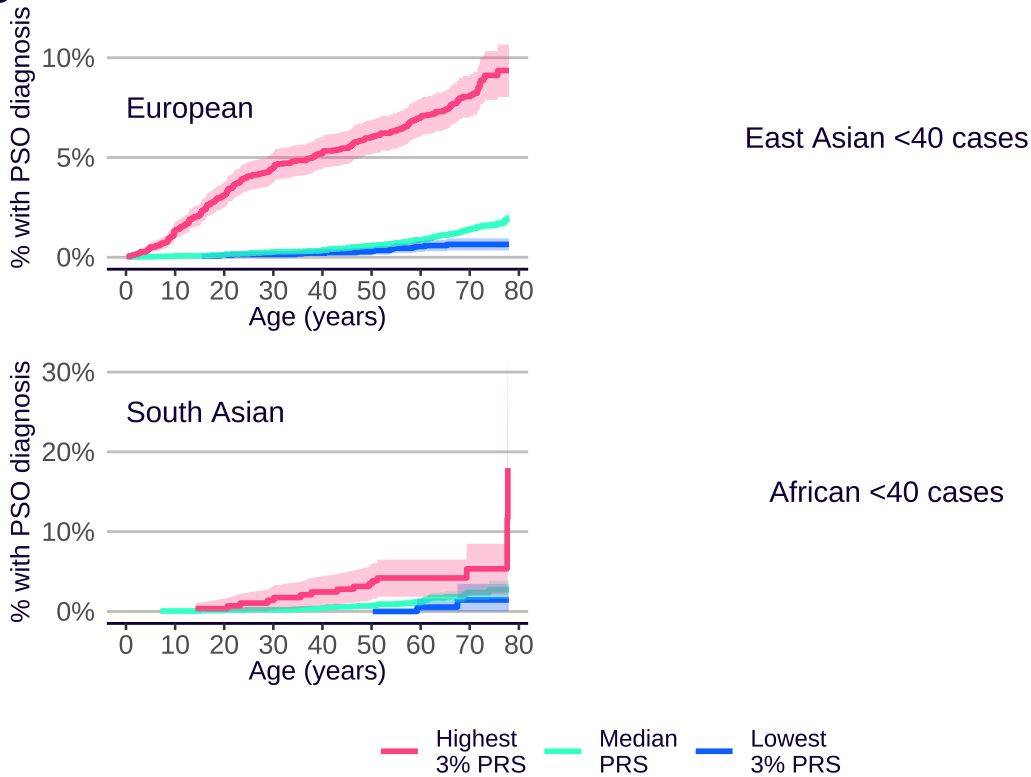

**V**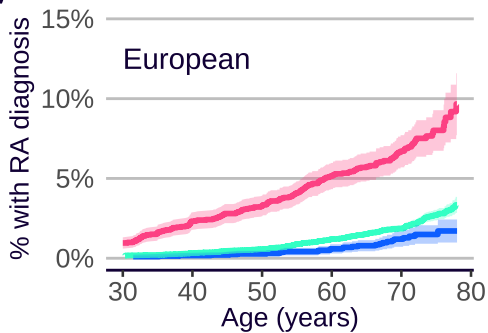**East Asian <40 cases**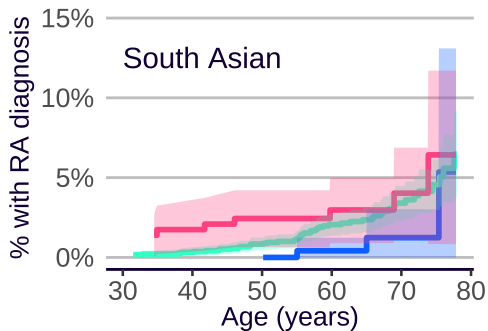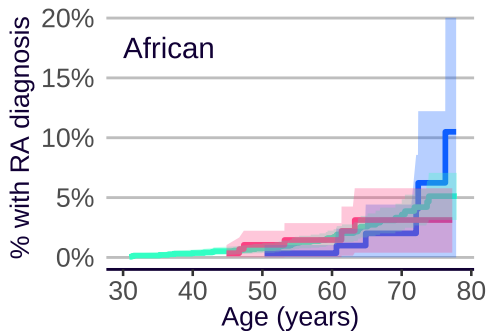

— Highest 3% PRS    — Median PRS    — Lowest 3% PRS

**W**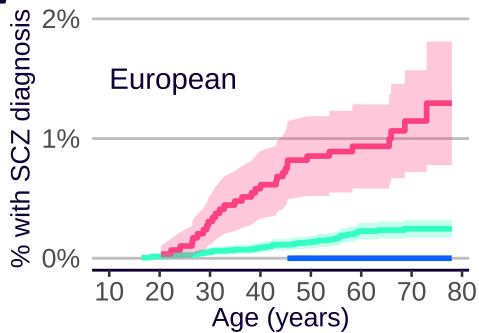

East Asian &lt;40 cases

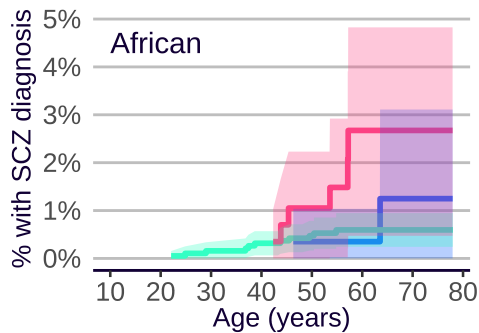

— Highest 3% PRS    — Median PRS    — Lowest 3% PRS

**X**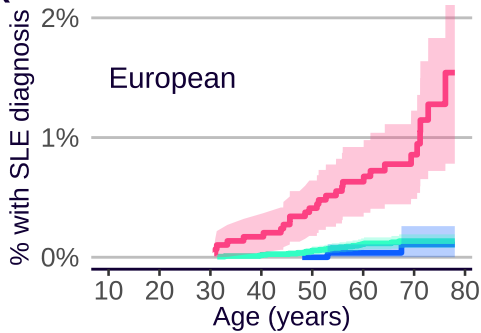

East Asian &lt;40 cases

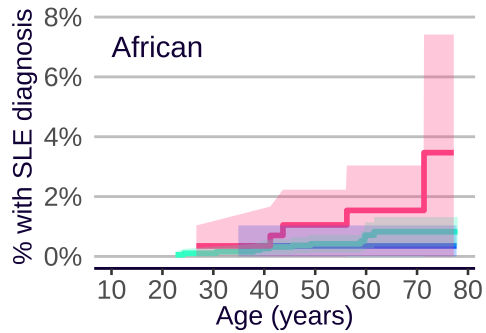

— Highest 3% PRS    — Median PRS    — Lowest 3% PRS

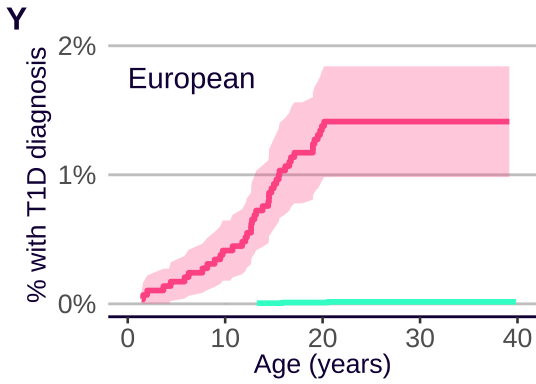

East Asian <40 cases

South Asian <40 cases

African <40 cases

— Highest 3% PRS    — Median PRS    — Lowest 3% PRS

**Z**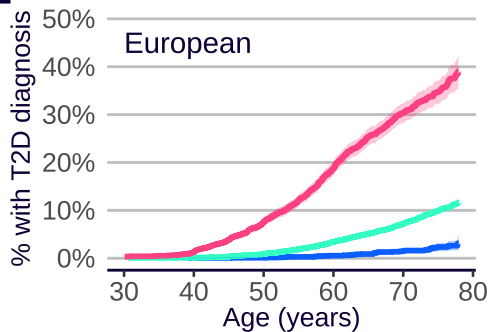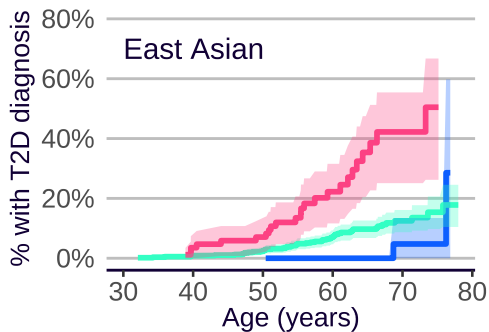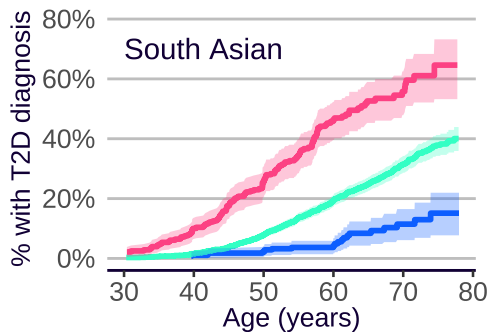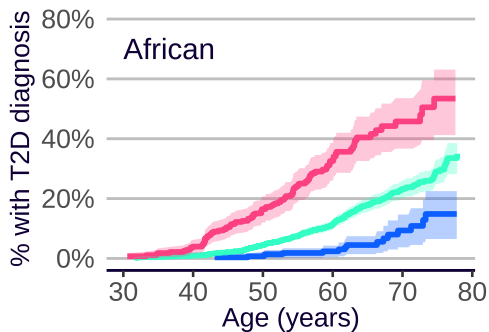

— Highest 3% PRS    — Median PRS    — Lowest 3% PRS

AA

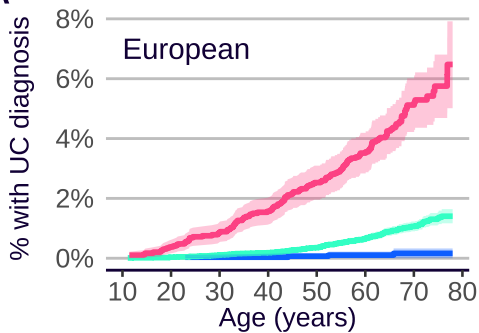

East Asian <40 cases

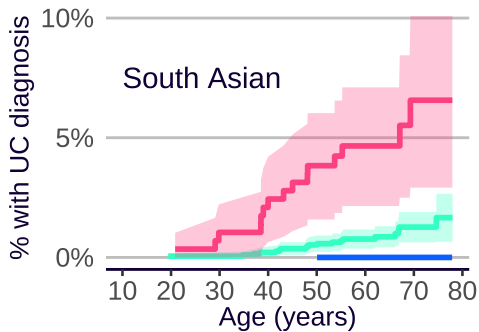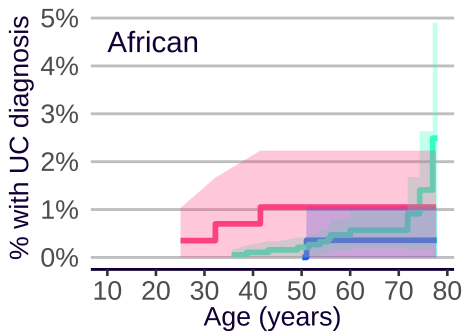

— Highest 3% PRS    — Median PRS    — Lowest 3% PRS

**AB**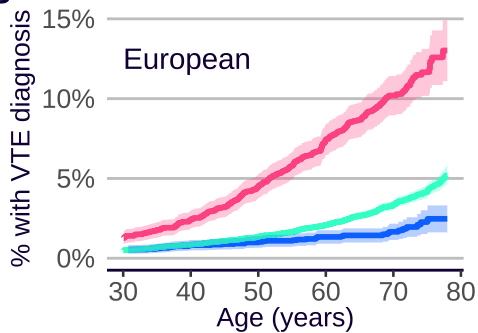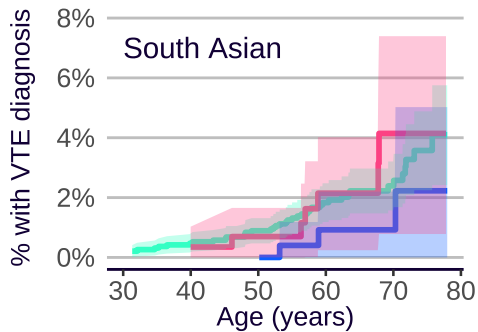

East Asian &lt;40 cases

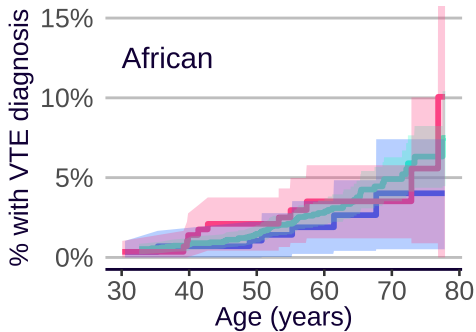

— Highest 3% PRS    — Median PRS    — Lowest 3% PRS
