# Supplementary material for: A systematic evaluation of the performance and properties of the UK Biobank Polygenic Risk Score (PRS) Release
Source: PubMed Central journal article supplement (PMC11410272; doi:10.1371/journal.pone.0307270), 2024-09-18

**B**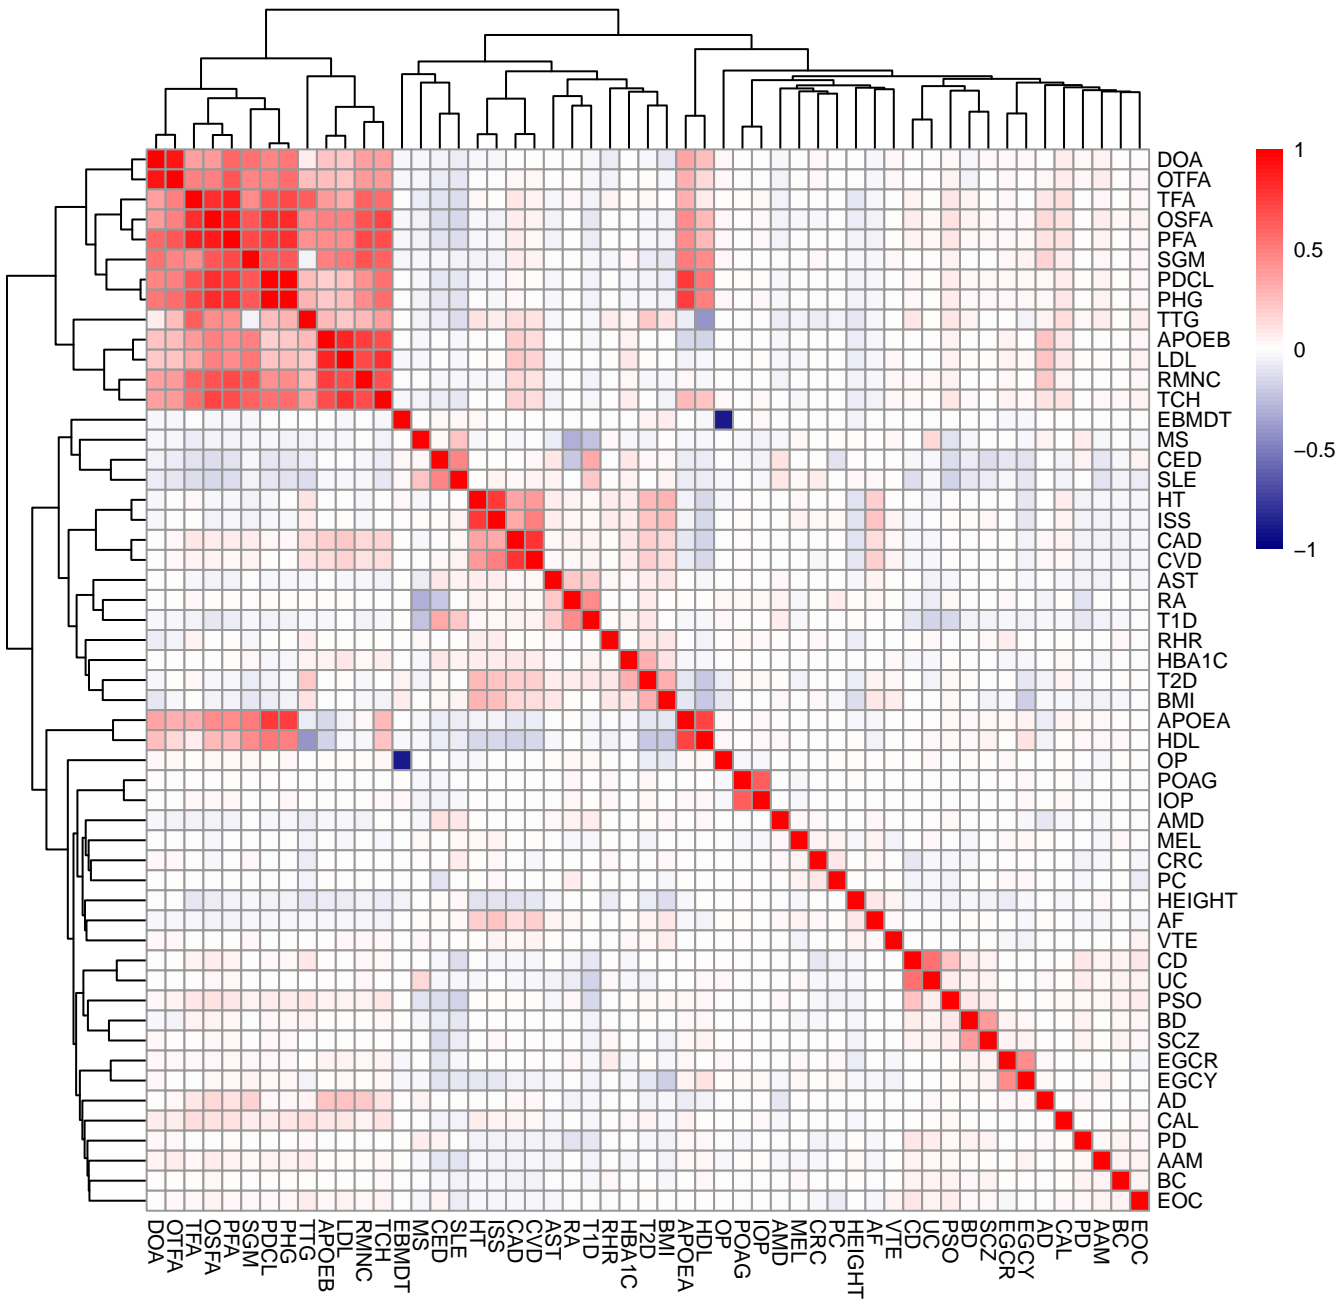

Supplement: pone.0307270.s024.pdf [file pone.0307270.s024.pdf]
